# Supplementary material for: Shedding Light on the Interaction of Human Anti-Apoptotic Bcl-2 Protein with Ligands through Biophysical and in Silico Studies
Source: Int J Mol Sci. 2019 Feb 16;20(4):860. doi: 10.3390/ijms20040860 (PMC6413030; doi:10.3390/ijms20040860)
Supplement: Supplementary file 1 [file ijms-20-00860-s001.pdf]

**Supplementary Information:**

**Table S1.** Potential energy and essential dynamics (ED) analysis of the MD simulations of the Bcl-2 complexes under study.

| Bcl2 and complex                      | Potential energy (kJ/mol) | ED 2D projection (nm <sup>2</sup> ) |
|---------------------------------------|---------------------------|-------------------------------------|
| Unbounded physiological form          | -739988                   | 156.13                              |
| Venetoclax bounded physiological form | -652857                   | 160.95                              |
| Unbounded chimeric form               | -640409                   | 119.88                              |
| Venetoclax bounded chimeric form      | -570630                   | 76.41                               |





**Table S4.** Time averaged structural properties obtained from MD simulation for Wild-Type (WT) of Bcl-2 and its variants

| SNP ID      | Substitution | RMSD (nm) | RMSF(nm) | Radius of Gyration(nm) | Intra-molecular hydrogen bonds | Trace of the diagonalized covariance matrix (nm <sup>2</sup> ) | Inter-molecular hydrogen bonds | Hydrophobic area (nm <sup>2</sup> ) | Hydrophilic area (nm <sup>2</sup> ) | Domain Distances (nm) |         |         |         |         |         |
|-------------|--------------|-----------|----------|------------------------|--------------------------------|----------------------------------------------------------------|--------------------------------|-------------------------------------|-------------------------------------|-----------------------|---------|---------|---------|---------|---------|
|             |              |           |          |                        |                                |                                                                |                                |                                     |                                     | BH1-BH2               | BH1-BH3 | BH1-BH4 | BH2-BH3 | BH2-BH4 | BH3-BH4 |
| Bcl2_WT     |              | 0.362     | 0.186    | 1.830                  | 145                            | 184.579                                                        | 467                            | 73.794                              | 63.576                              | 1.345                 | 1.199   | 1.843   | 1.48    | 2.105   | 1.435   |
| rs551395951 | Bcl2_H94P    | 0.244     | 0.141    | 1.802                  | 144                            | 110.994                                                        | 455                            | 70.865                              | 61.439                              | 1.382                 | 1.27    | 1.818   | 1.48    | 2.153   | 1.466   |
| rs528042823 | Bcl2_L97P    | 0.288     | 0.203    | 1.816                  | 139                            | 210.218                                                        | 481                            | 74.519                              | 65.744                              | 1.33                  | 1.301   | 1.838   | 1.511   | 2.061   | 1.41    |
| rs1800477   | Bcl2_A43T    | 0.358     | 0.17     | 1.819                  | 146                            | 156.194                                                        | 470                            | 74.064                              | 64.228                              | 1.353                 | 1.344   | 1.793   | 1.465   | 2.081   | 1.452   |
| rs777784952 | Bcl2_R129C   | 0.295     | 0.174    | 1.802                  | 142                            | 167.427                                                        | 475                            | 73.788                              | 63.537                              | 1.341                 | 1.343   | 1.82    | 1.477   | 2.083   | 1.415   |
| rs775404824 | Bcl2_G8E     | 0.408     | 0.194    | 1.830                  | 143                            | 206.089                                                        | 473                            | 73.195                              | 63.982                              | 1.338                 | 1.322   | 1.871   | 1.468   | 2.098   | 1.451   |
| rs763718170 | Bcl2_S105P   | 0.345     | 0.165    | 1.808                  | 139                            | 155.571                                                        | 477                            | 72.831                              | 63.421                              | 1.344                 | 1.351   | 1.836   | 1.46    | 2.082   | 1.423   |
| rs762635201 | Bcl2_S105F   | 0.406     | 0.215    | 1.825                  | 139                            | 243.526                                                        | 463                            | 72.830                              | 64.586                              | 1.383                 | 1.1     | 1.804   | 1.405   | 2.087   | 1.756   |
| rs751038951 | Bcl2_F104S   | 0.377     | 0.196    | 1.824                  | 143                            | 199.994                                                        | 466                            | 74.655                              | 62.612                              | 1.384                 | 1.357   | 1.859   | 1.325   | 2.073   | 1.591   |
| rs748122615 | Bcl2_R207W   | 0.280     | 0.175    | 1.818                  | 145                            | 166.199                                                        | 466                            | 75.956                              | 62.912                              | 1.342                 | 1.365   | 1.855   | 1.465   | 2.093   | 1.458   |
| rs540701354 | Bcl2_D34Y    | 0.334     | 0.17     | 1.806                  | 143                            | 159.055                                                        | 454                            | 72.621                              | 62.122                              | 1.346                 | 1.306   | 1.815   | 1.457   | 2.074   | 1.415   |
| rs376149674 | Bcl2_G233D   | 0.418     | 0.178    | 1.853                  | 141                            | 177.832                                                        | 488                            | 74.719                              | 65.266                              | 1.352                 | 1.36    | 1.835   | 1.438   | 2.099   | 1.475   |
| rs148811059 | Bcl2_G203S   | 0.342     | 0.181    | 1.825                  | 143                            | 169.393                                                        | 475                            | 75.277                              | 64.845                              | 1.337                 | 1.306   | 1.844   | 1.353   | 2.064   | 1.514   |

**Table S5.** List of putative and known inhibitors (Taxol) for FLD of Physiological Bcl-2 form. The putative inhibitors were identified from HTVS and docking analysis against Zinc Data base (Ranked according to CDRUG P-Value).

| Zinc Accession No | Structure                                                                         | Ligand interaction Diagram                                                          |
|-------------------|-----------------------------------------------------------------------------------|-------------------------------------------------------------------------------------|
| ZINC20149102      | 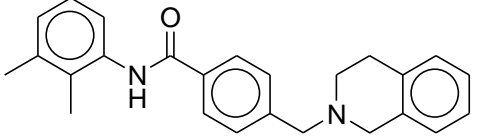 | 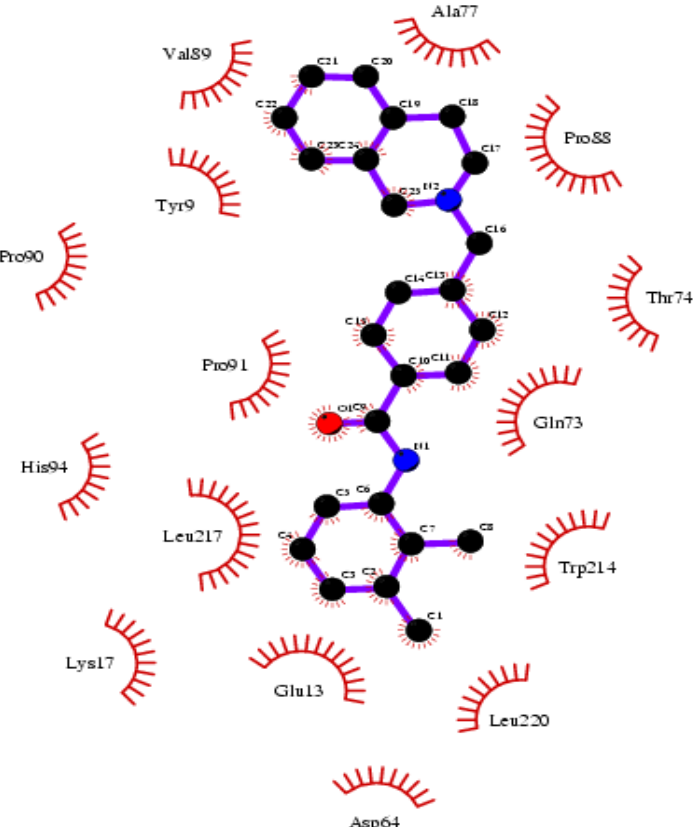 |

ZINC22238492

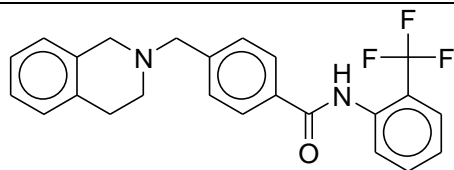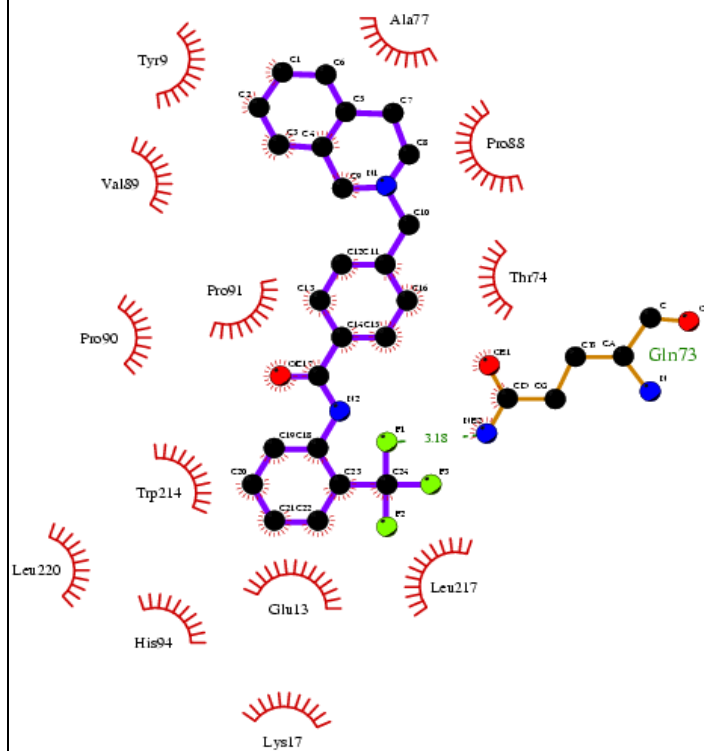

ZINC09066116

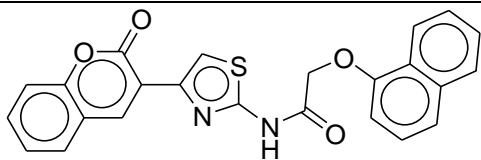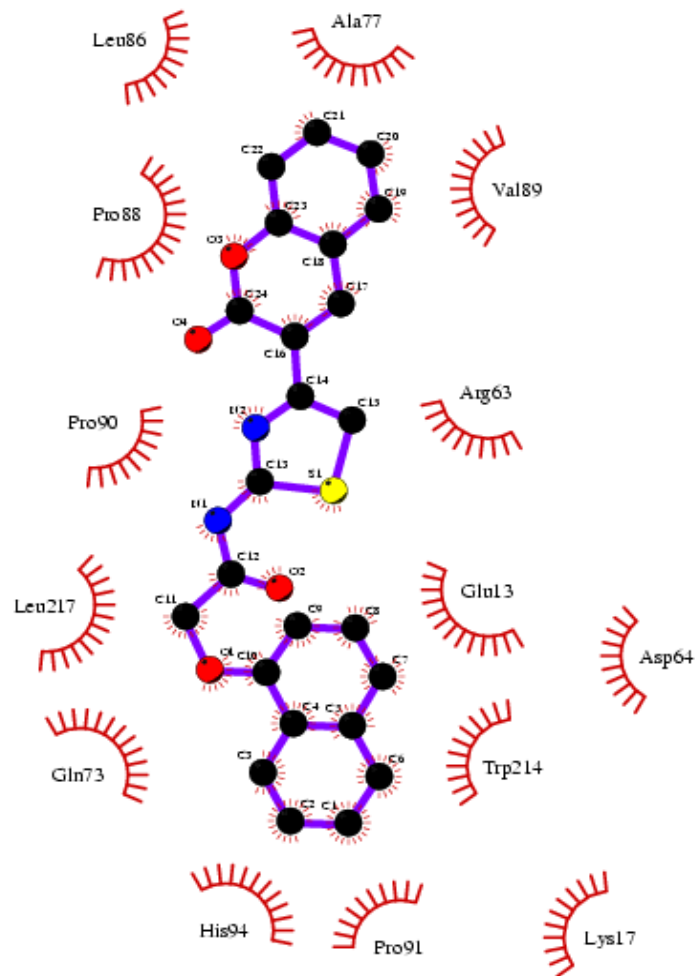

ZINC04921974

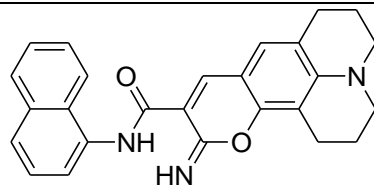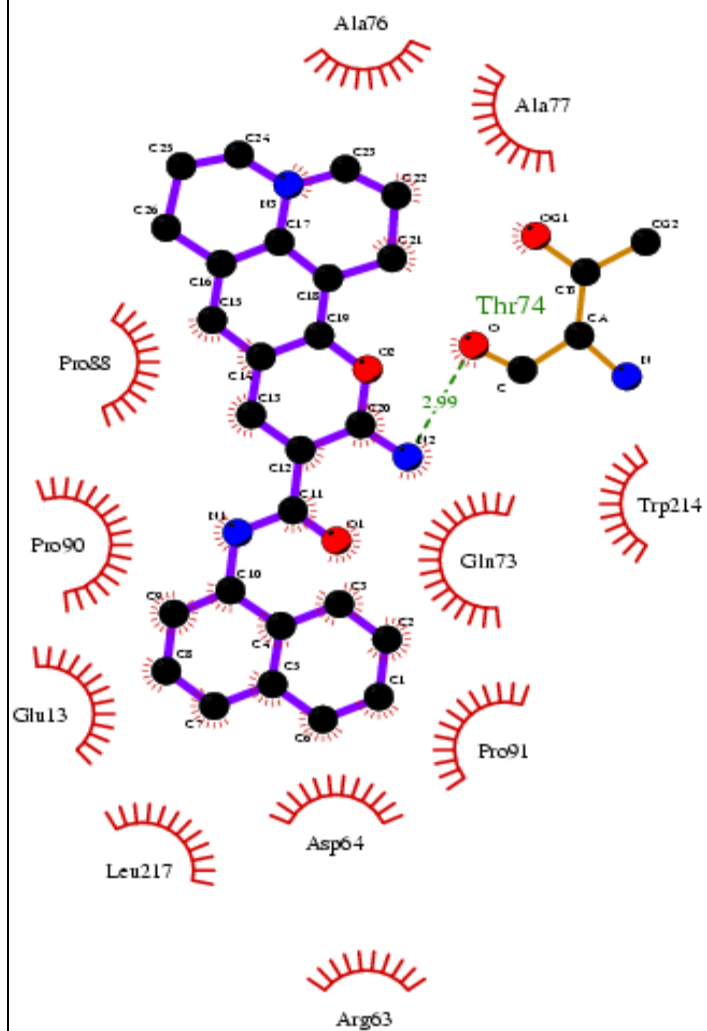

ZINC09475116

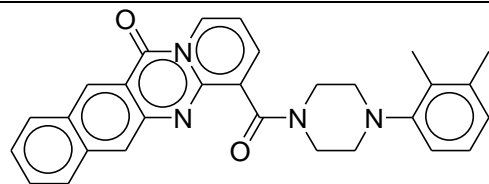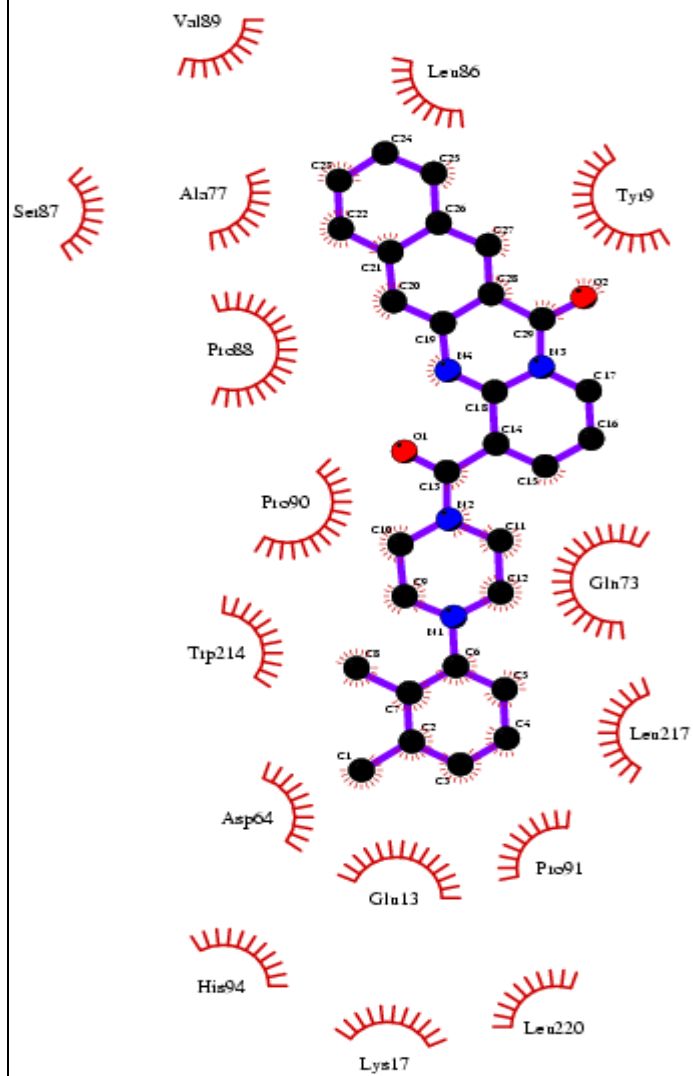

Taxol (ZINC96006020)

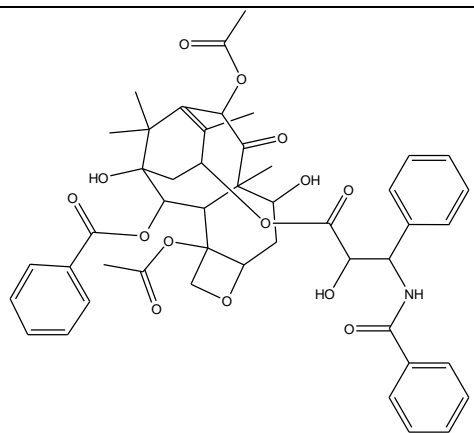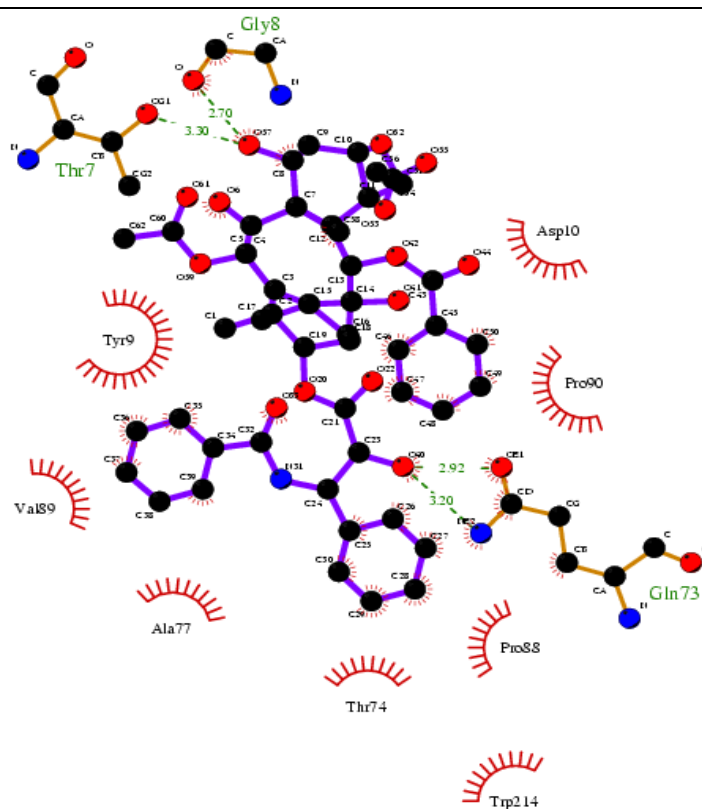

**Table S6.** Specific input parameters for MD simulations of each Bcl-2 nsSNP studied.

| SNP ID      | Substitution | SPC water molecules (#) | System net charge (e) | Ion replacement (# Na <sup>+</sup> ) |
|-------------|--------------|-------------------------|-----------------------|--------------------------------------|
| Wild-Type   |              | 15049                   | -1.00                 | 1                                    |
| rs775404824 | G8E          | 15411                   | -2.00                 | 2                                    |
| rs540701354 | D34Y         | 15419                   | 0.00                  | 0                                    |
| rs1800477   | A43T         | 15419                   | 0.00                  | 0                                    |
| rs551395951 | H94P         | 15364                   | -1.00                 | 1                                    |
| rs528042823 | L97P         | 15364                   | -1.00                 | 1                                    |
| rs751038951 | F104S        | 15423                   | -1.00                 | 1                                    |
| rs762635201 | S105F        | 15416                   | -1.00                 | 1                                    |
| rs763718170 | S105P        | 15366                   | -1.00                 | 1                                    |
| rs777784952 | R129C        | 15418                   | -2.00                 | 2                                    |
| rs148811059 | G203S        | 15414                   | -1.00                 | 1                                    |
| rs748122615 | R207W        | 15415                   | -2.00                 | 2                                    |
| rs376149674 | G233D        | 15415                   | -2.00                 | 2                                    |

**Figure S1.** Molecular dynamics simulation results of Physiological Bcl2 form - Unbounded with Venetoclax bounded (a) Root Mean Square Deviation (Black: Apo & Red: complex), (b) Radius of Gyration (Black: Apo & Red: complex), (c) Potential energy (Black: Apo & Red: complex), (d) Principal component analysis (Black: Apo & Red: complex), (e) Solvent Accessible Surface Area for unbounded and (e) Solvent Accessible Surface Area for bounded forms

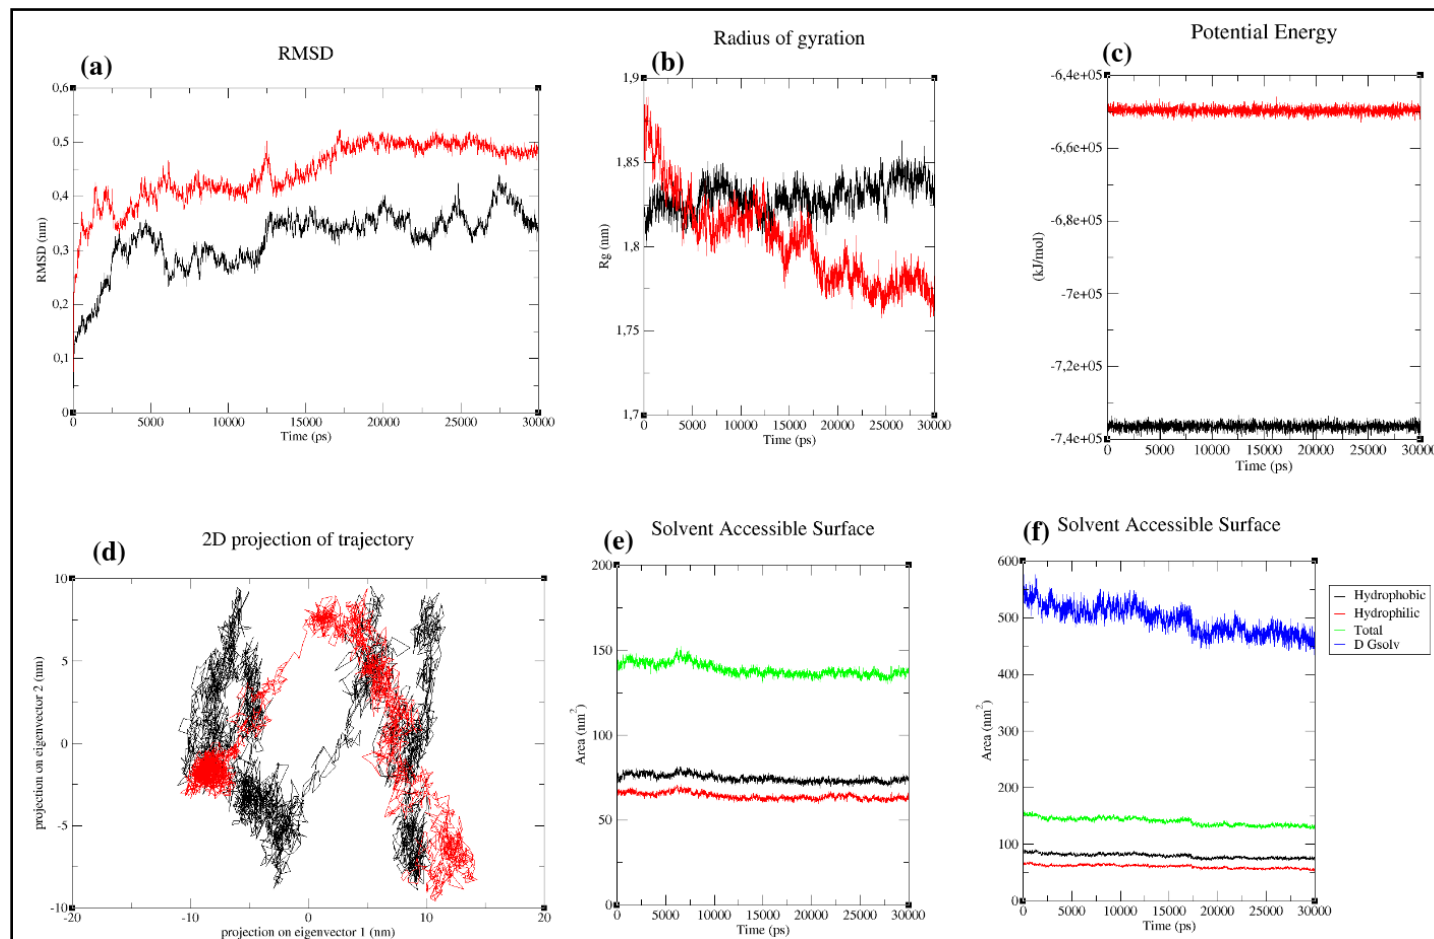

**Figure S2.** Molecular dynamics simulation results of Chimeric Bcl2 form - Unbounded with Venetoclax bounded (a) Root Mean Square Deviation (Black: Apo & Red: complex), (b) Radius of Gyration (Black: Apo & Red: complex), (c) Potential energy (Black: Apo & Red: complex), (d) Principal component analysis (Black: Apo & Red: complex), (e) Solvent Accessible Surface Area for unbounded and (f) Solvent Accessible Surface Area for bounded forms

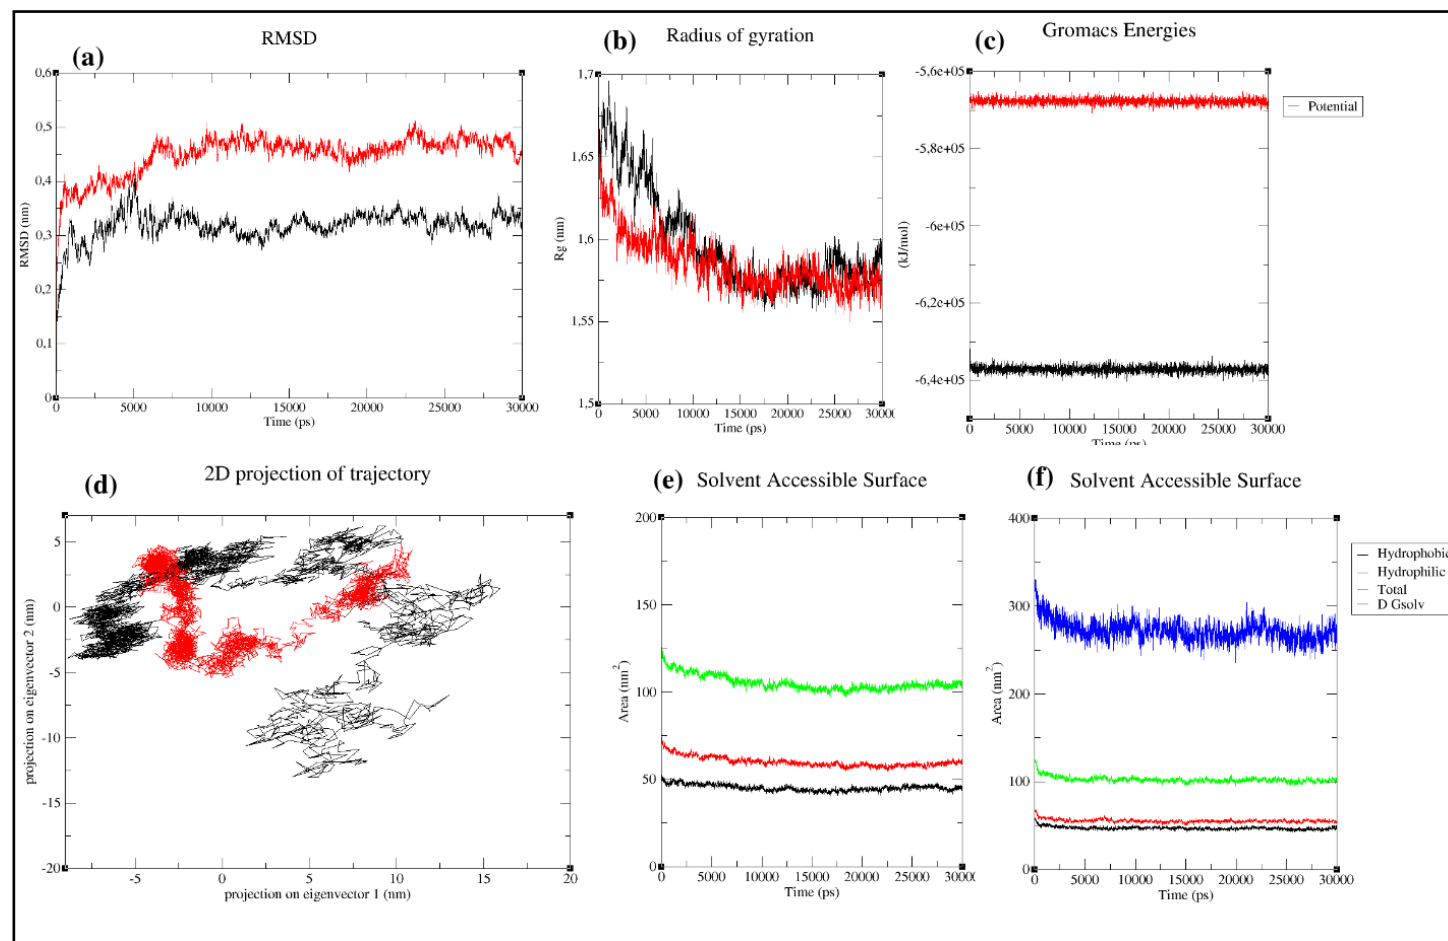

**Figure S3.** Molecular dynamics simulation results of Physiological Bcl-2 form:Venetoclax (Black) with Chimeric Bcl-2 form:Venetoclax (Red) (a) Root Mean Square Deviation, (b) Radius of Gyration, (c) Intermolecular hydrogen bonds, (d) Potential energy, (e) Principal component analysis, (f) Solvent Accessible Surface Area for Physiological Bcl-2 form:Venetoclax (g) Solvent Accessible Surface Area for Chimeric Bcl2 form:Venetoclax

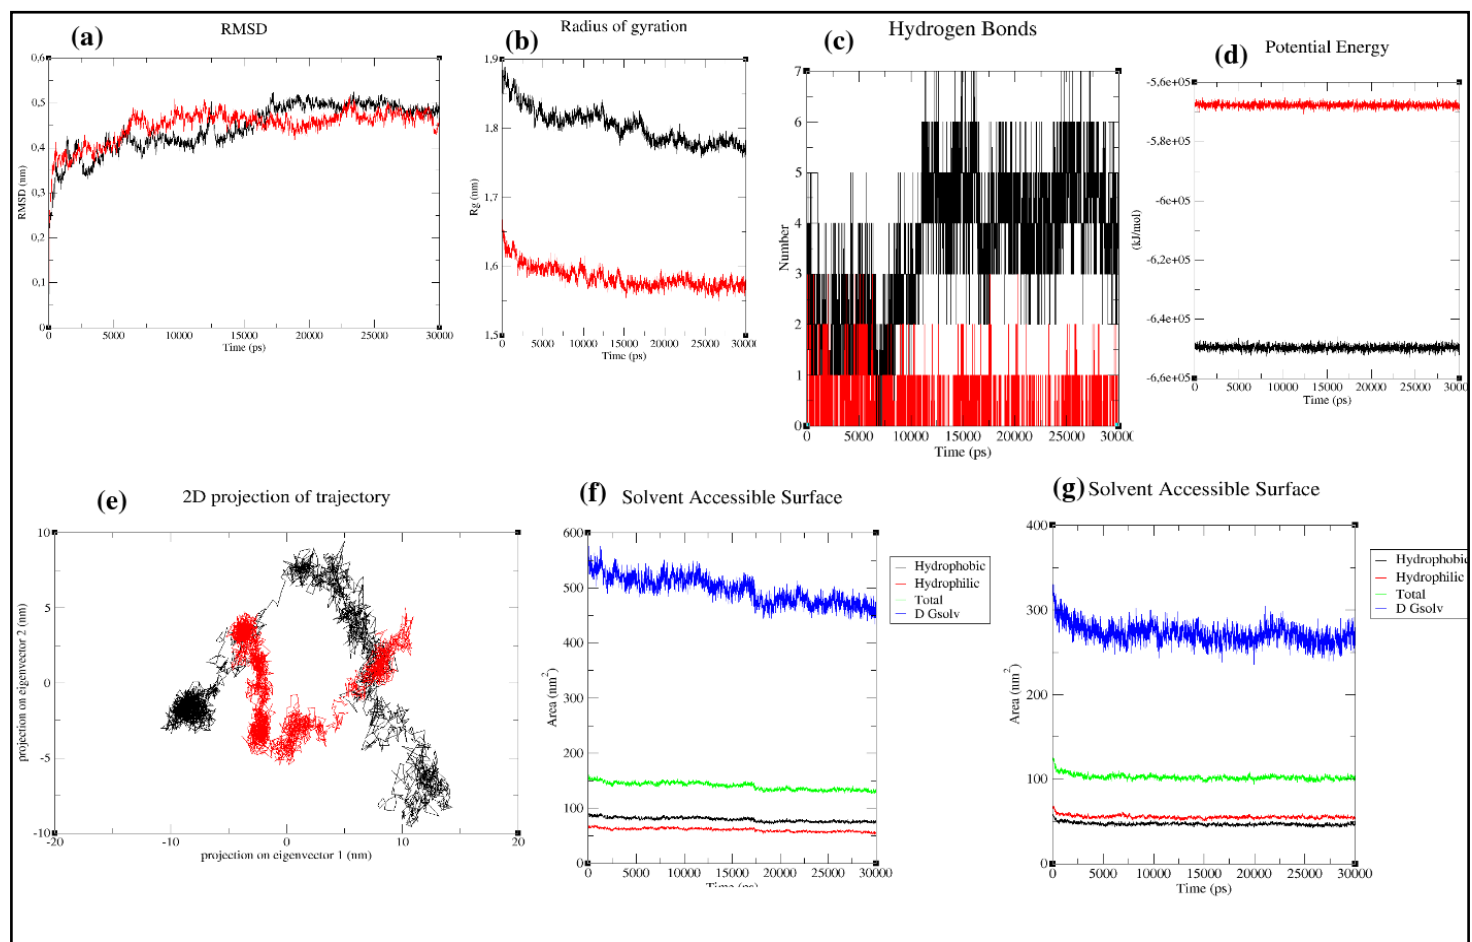



**Figure S5.** Structural alignment of Bcl-2 (PDB ID: 1GJH) with Bcl-XL (PDB ID: 2LPC). Chain 1 is Bcl-2 and chain 2 is Bcl-XL. Residues are color-coded by similarity match.

■EQR:148 Len1:164 Len2:185 score: 305,12 Z-score:6,23 RMSD:2,58 SeqID:57% SeqSim:69% Cov1:90% Cov2:80%

```

10:A  DNREI VMKYI HYKLS QRGYEW - - DAGDD - - - - V E E N R T E A P E G T E S E V V H L T L R Q A G D D F S R R Y R R D F A 113:A
4:A   SNREL VVDFL SYKLS QKGYSW S Q F S D V E E N R T E A - - - - - P E G T E S E A V K Q A L R E A G D E F E L R Y R R A F S 66:A

114:A  E M S S Q L H L T P F T A R G R F A T V V E E L F R D G V N W G R I V A F F E F G G V M C V E S V N R E M S P L V D N I A L W M T E Y L N R 183:A
67:A  D L T S Q L H I T P G T A Y Q S F E Q V V N E L F R D G V N W G R I V A F F S F G G A L C V E S V D K E M Q V L V S R I A A W M A T Y L N D 136:A

184:A  H L H T W I Q D N G G W D A F V E L Y G P S 205:A
137:A  H L E P W I Q E N G G W D T F V E L Y G N N 158:A

```

**Figure S6.** Structural alignment of Bcl-2 (PDB ID: 1GJH) with Bcl-W (PDB ID: 1MK3). Chain 1 is Bcl-2 and chain 2 is Bcl-W. Residues are color-coded by similarity match.

■EQR:138 Len1:164 Len2:178 score: 494,51 Z-score:5,73 RMSD:3,94 SeqID:35% SeqSim:45% Cov1:84% Cov2:78%

```

5:A   G R T G Y D N R E I V M K Y I H Y K L S Q R G Y E W D A G D D V E E N R T E A P E G - - - - - T E S E V V H L T L R Q A G D D F S R R 107:A
3:A   P A S A P D T R A L V A D F V G Y K L R Q K G Y V - - - - - C G A G P G E G P A A D - P L H Q A M R A A G D E F E T R 55:A

108:A  Y R R D - - - F A E M S S - - Q L H L T P F T A R G R F A T V V E E L F R D G V N W G R I V A F F E F G G V M C V E S V N R E M S P L V D N 172:A
56:A  F R R T F S D L A A Q L H V T P G S - - - - - A Q Q R F T Q V S D E L F Q G G P N W G R L V A F F V F G A A L C A E S V N K E M E V L V G Q 120:A

173:A  I A L W M T E Y L N R H L H T W I Q D N G G W D A F V E L Y G P S 205:A
121:A  V Q E W M V A Y L E T R L A D W I H S S G G W A E F T A L Y G D G 153:A

```
